# Supplementary material for: Cortical microinfarcts potentiate recurrent ischemic injury through NLRP3-dependent trained immunity
Source: PubMed Central journal article supplement (PMC10786939; doi:10.1038/s41419-023-06414-7), 2024-01-12

# Full and uncropped western blot for Figure 3B

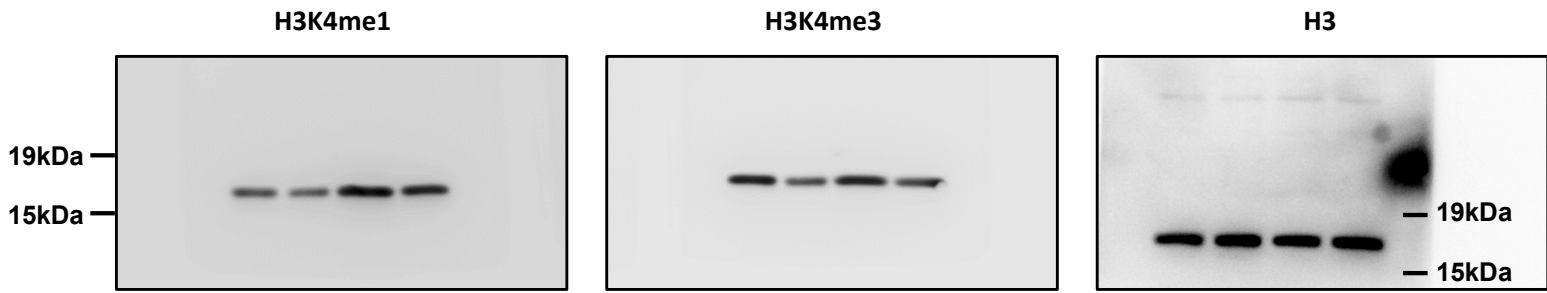

Full and uncropped western blot for Figure 3l

**TNF- $\alpha$**

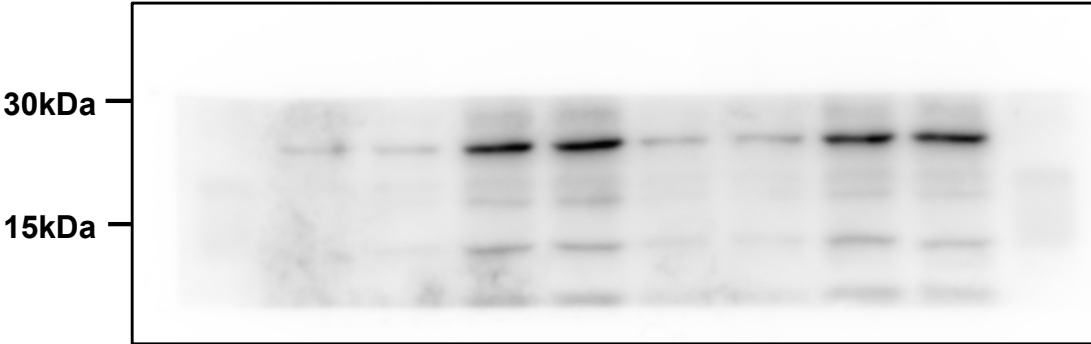

**IL-6**

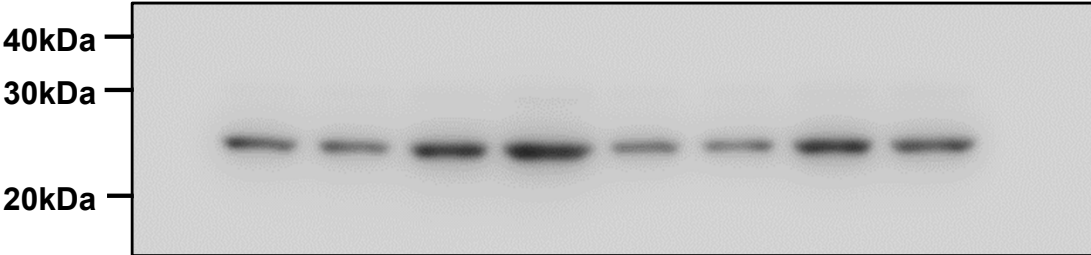

**IL-1 $\beta$**

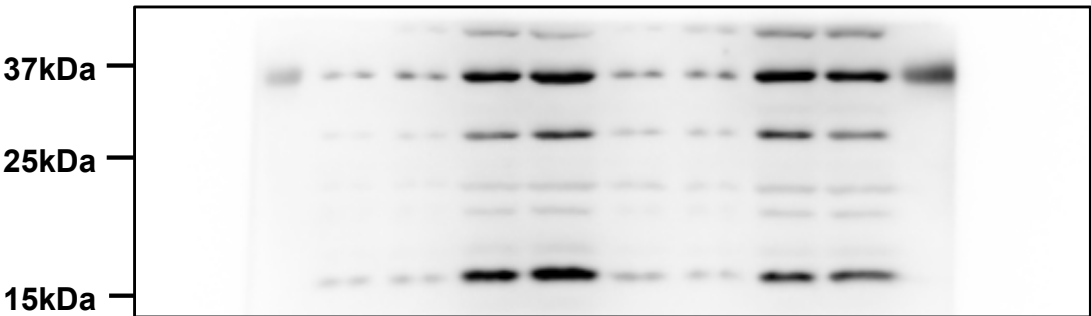

**IL-10**

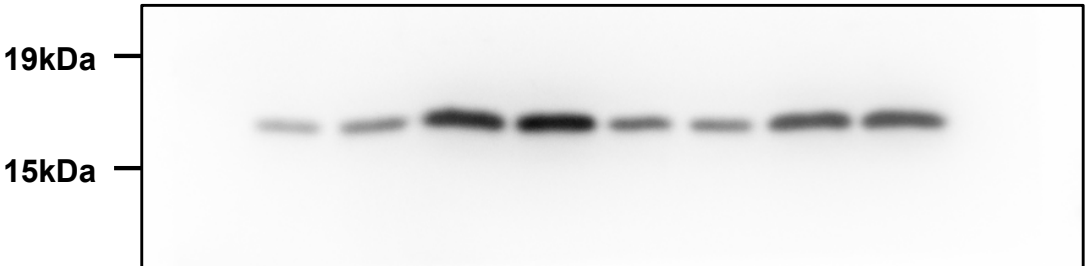

**$\beta$ -actin**

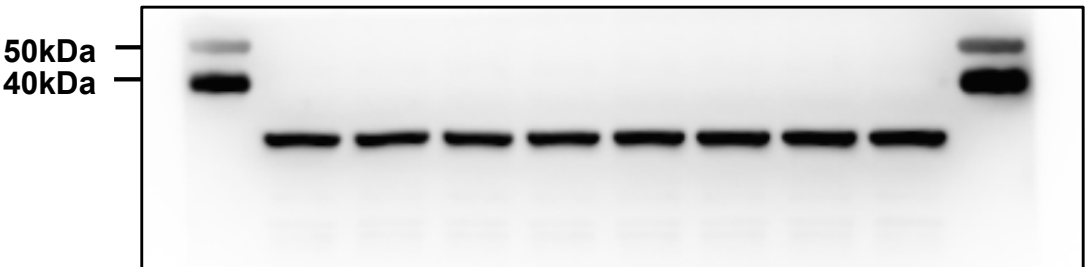

# Full and uncropped western blot for Figure 4A

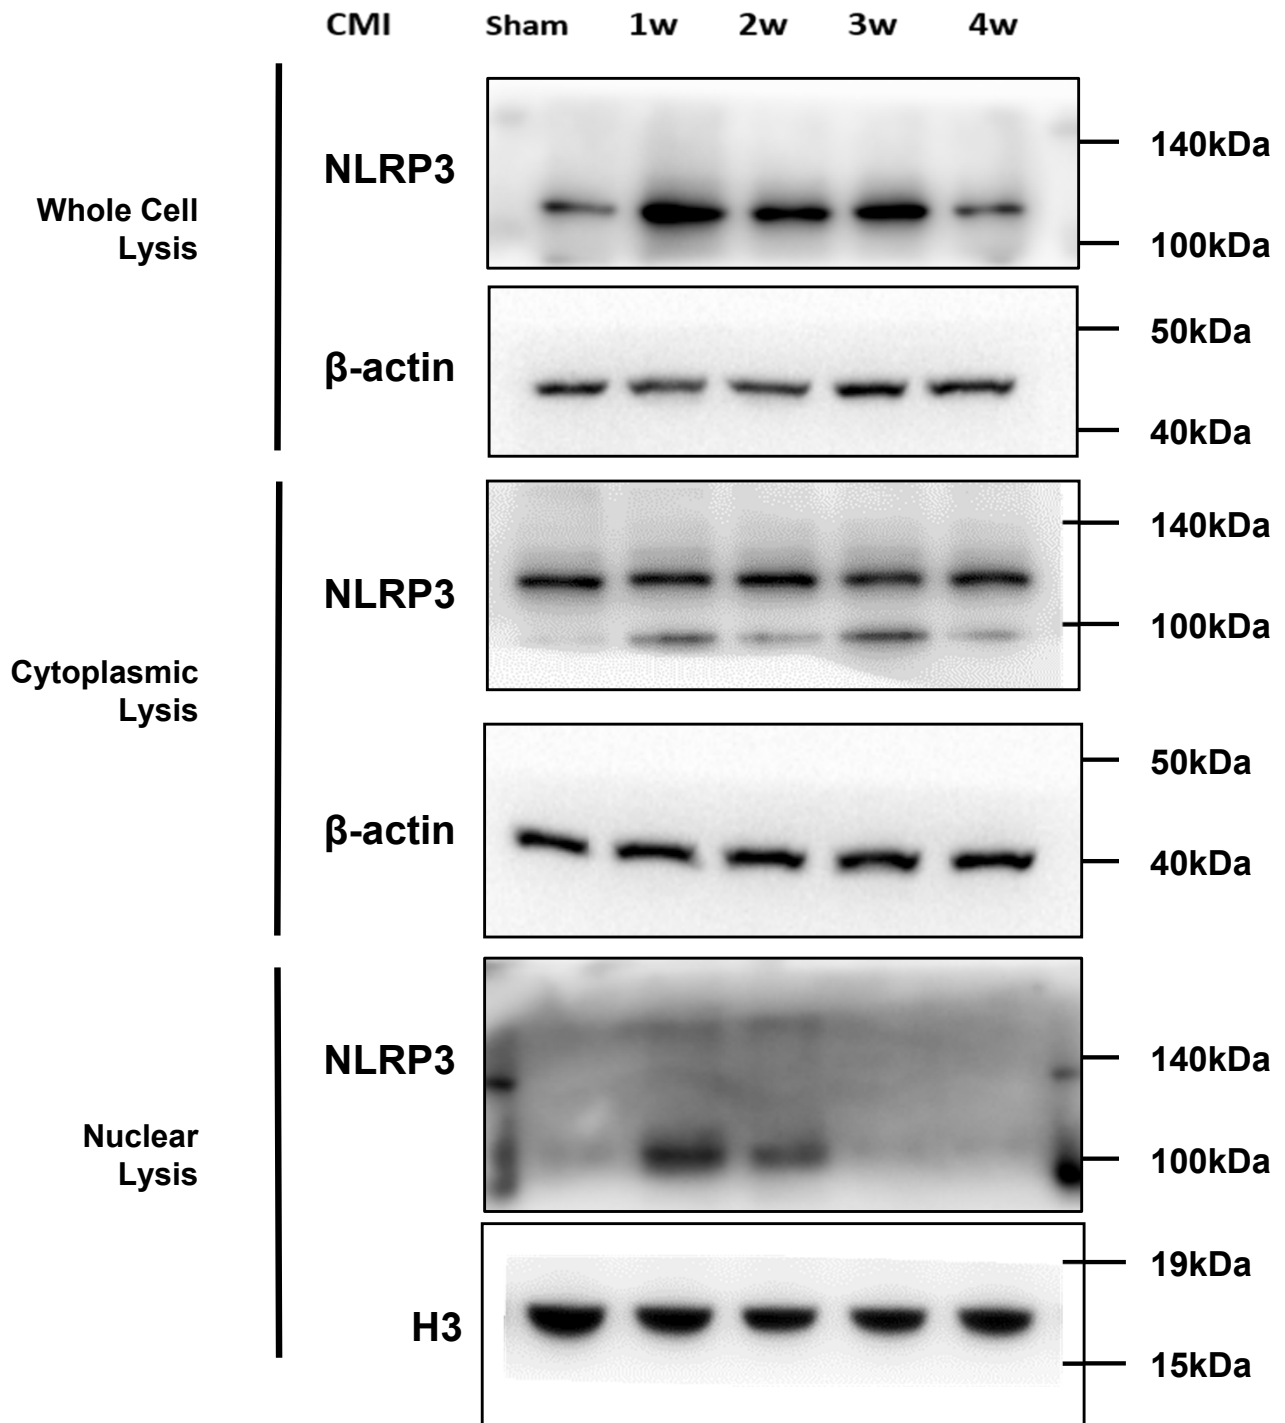

# Full and uncropped western blot for Figure 4G

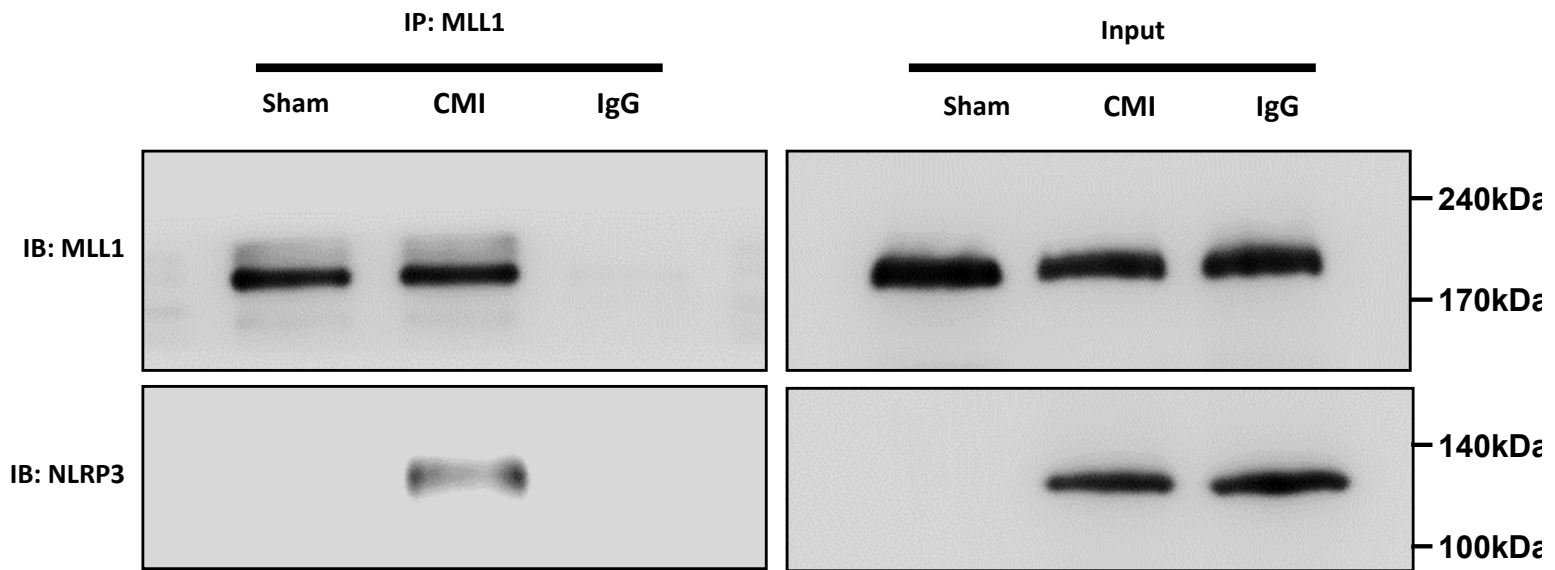

# Full and uncropped western blot for Figure 4K

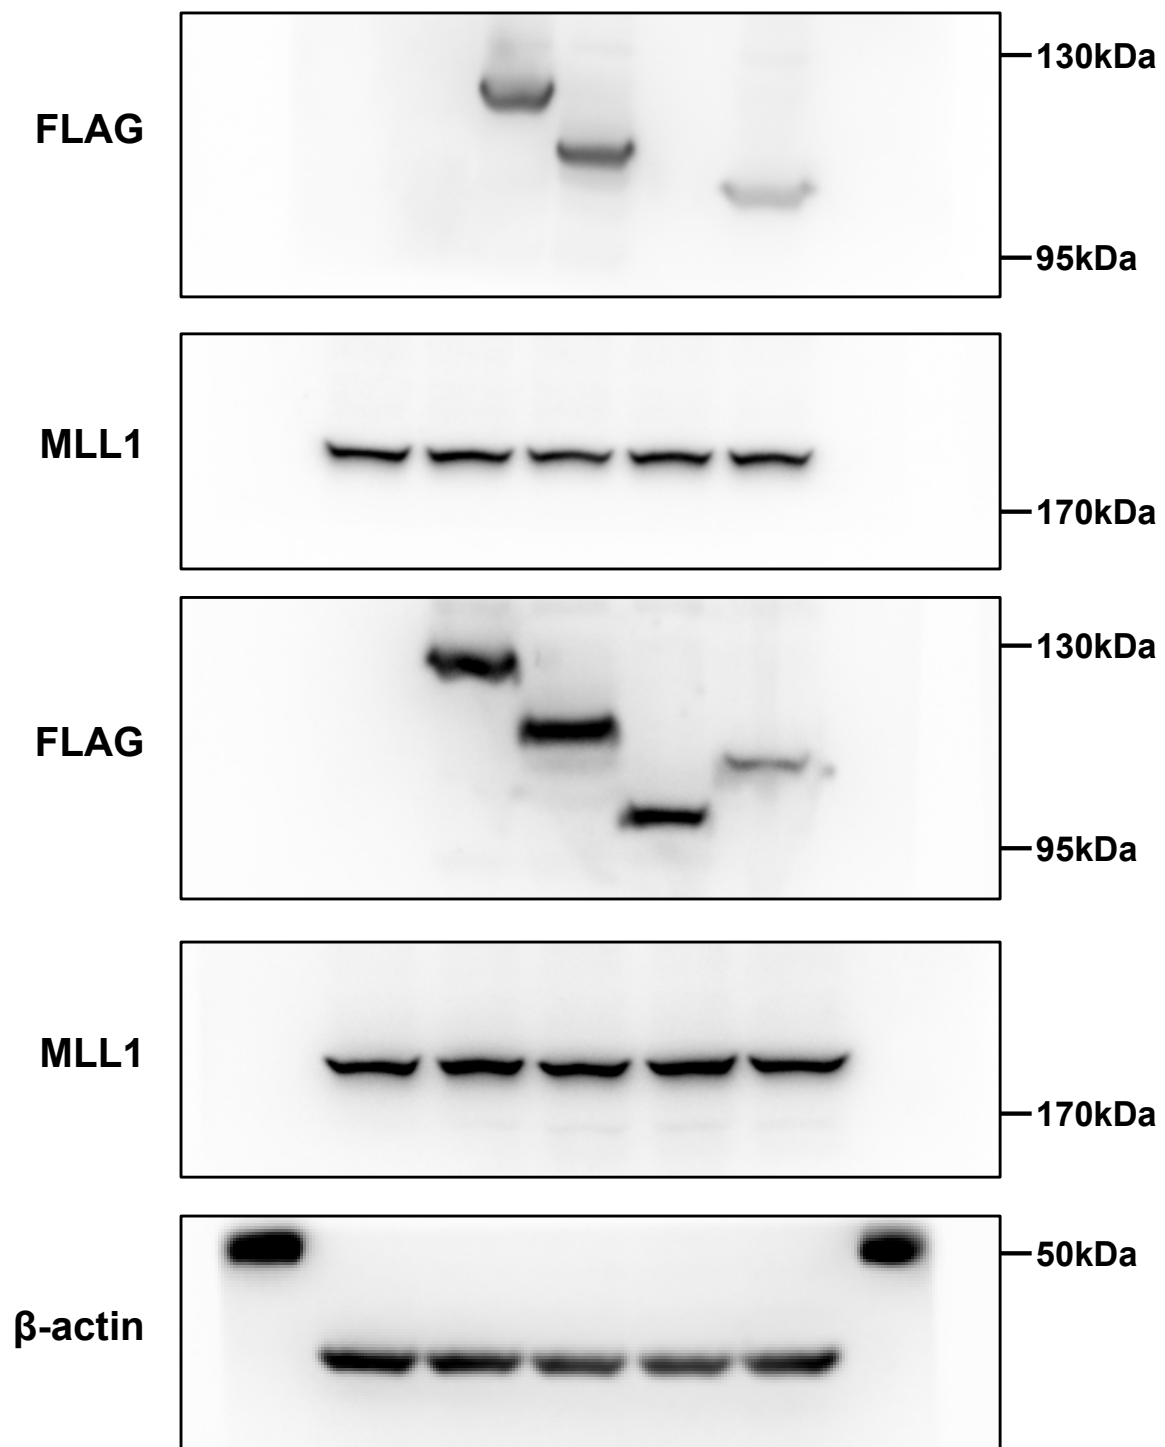

# Full and uncropped western blot for Figure 5B

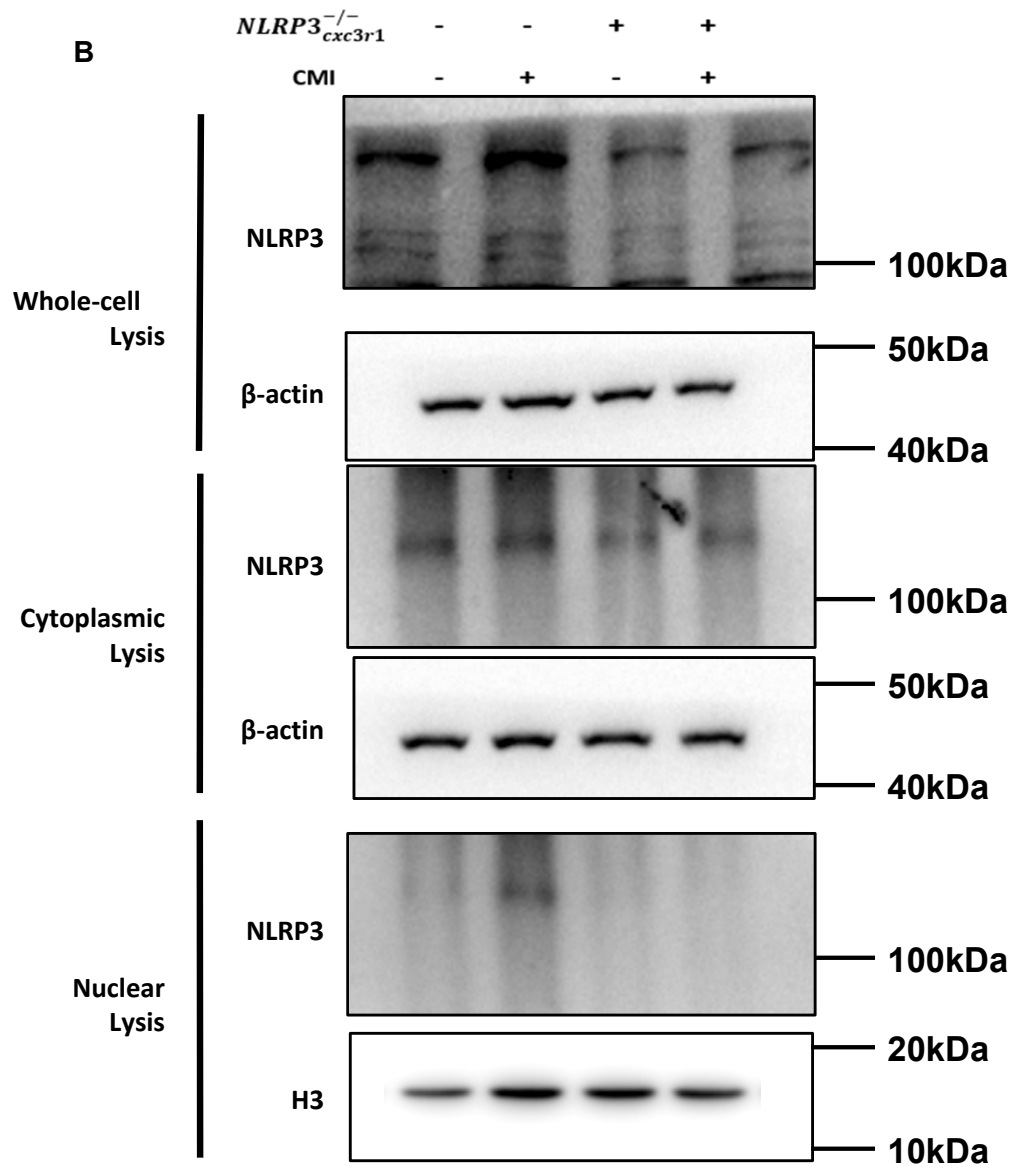

# Full and uncropped western blot for Figure 5C

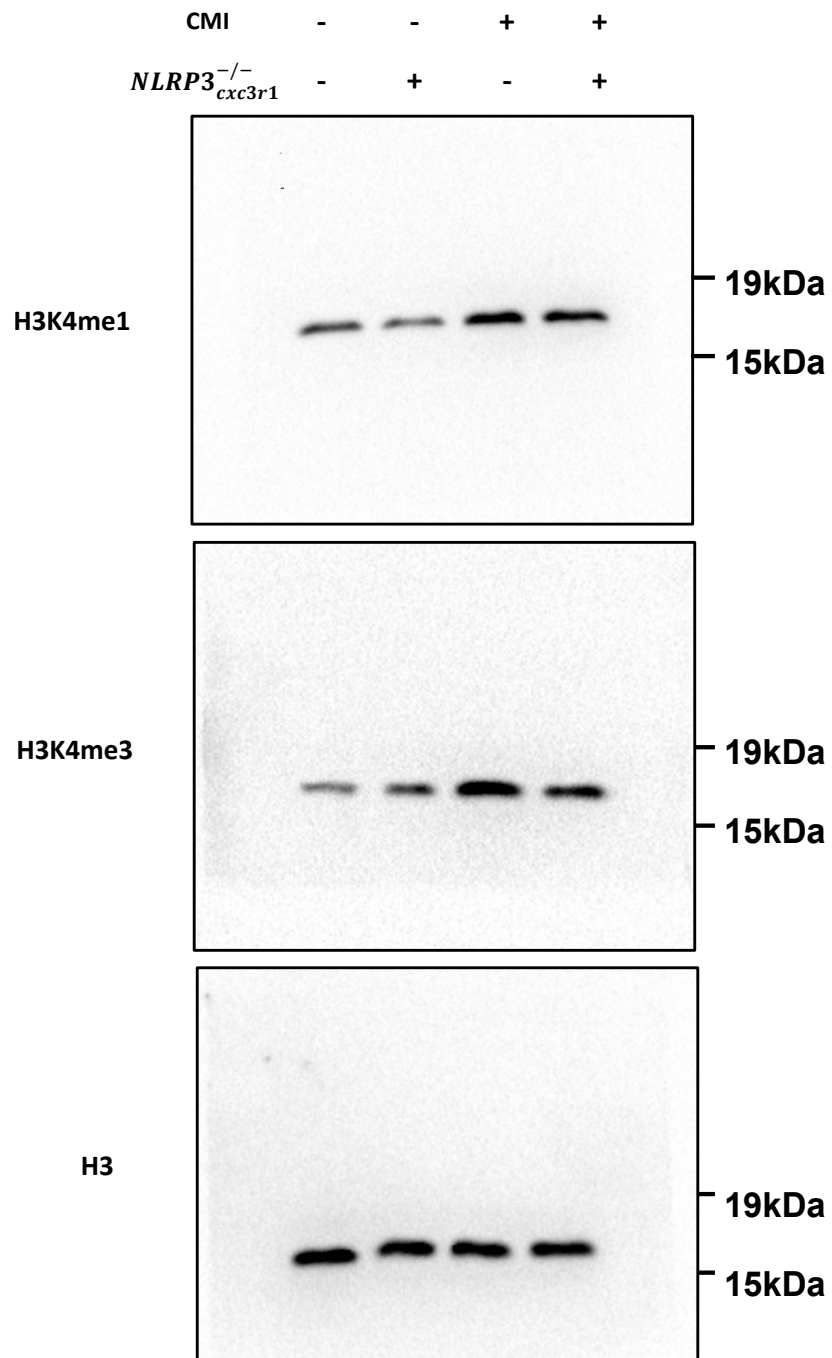

# Full and uncropped western blot for Figure S1G

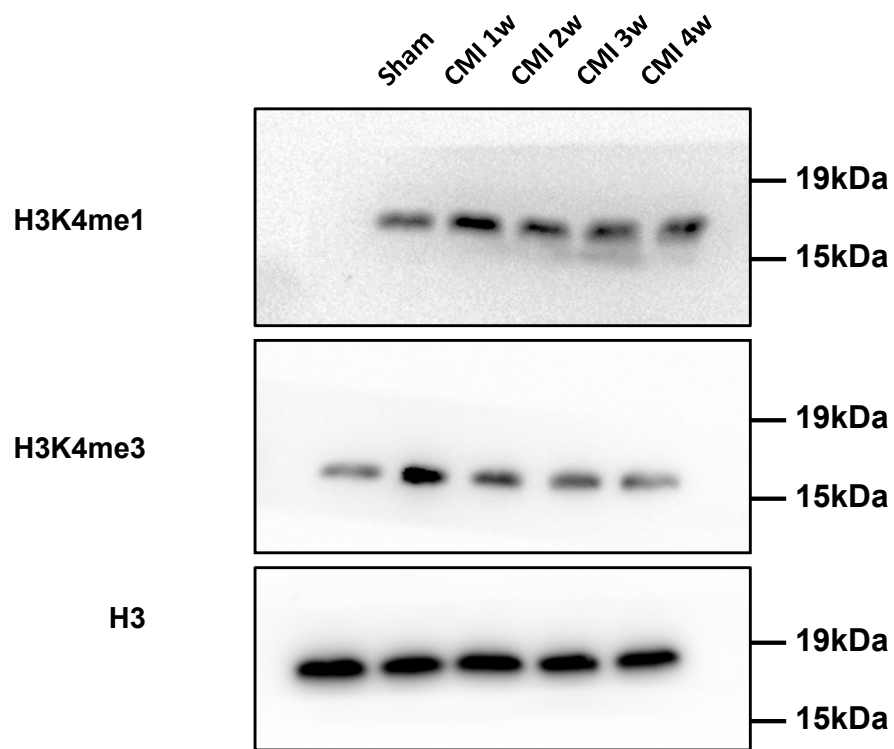





# Full and uncropped western blot for Figure S4B

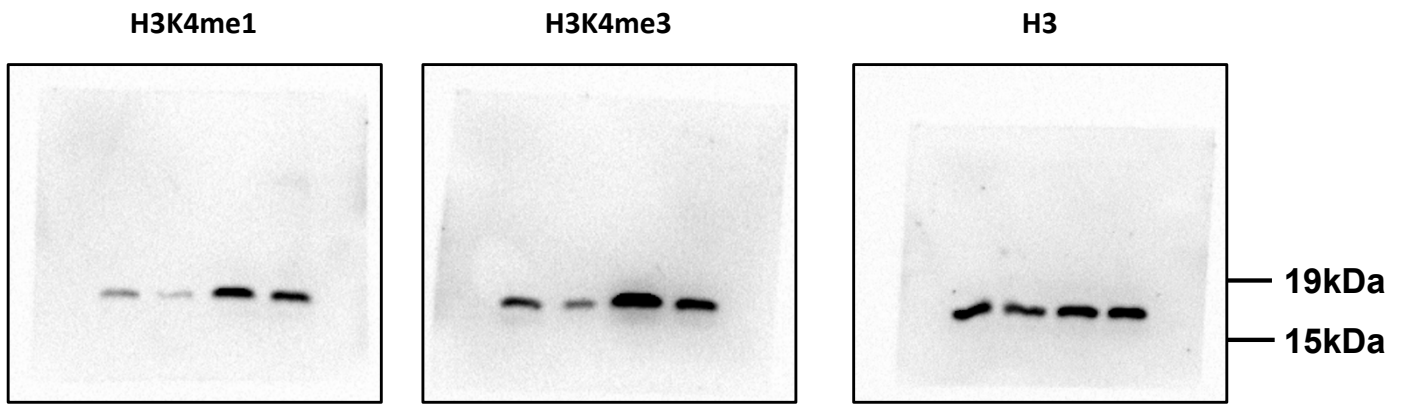

Full and uncropped western blot for Figure S4I

**TNF- $\alpha$**

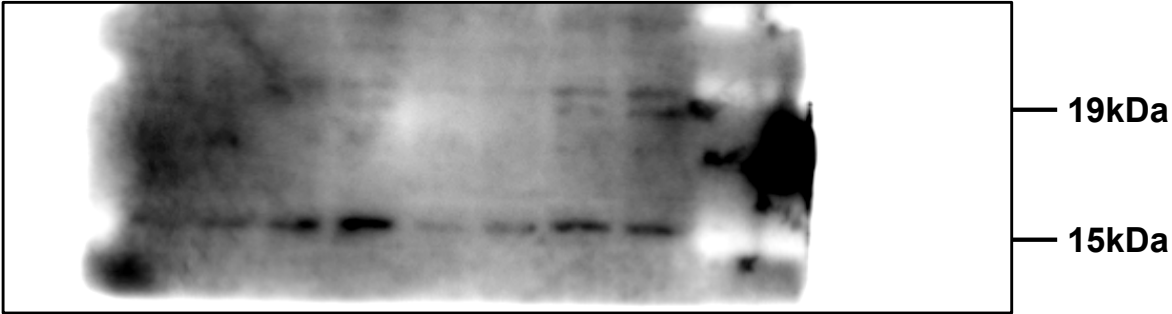

**IL-6**

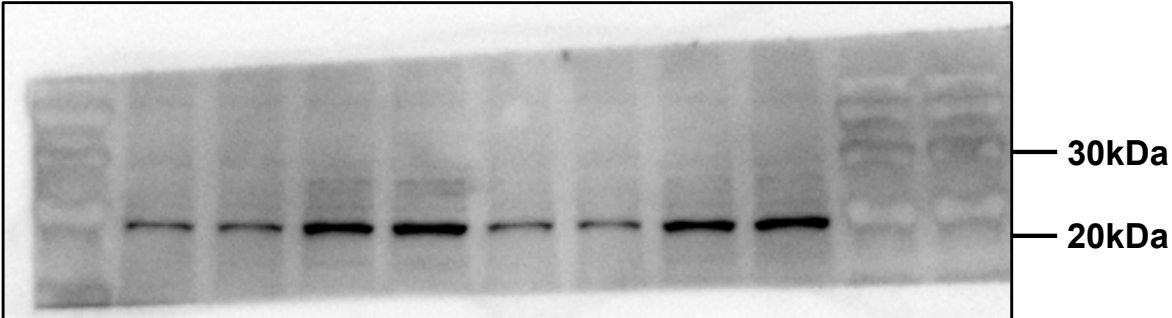

**pro-IL-1 $\beta$**

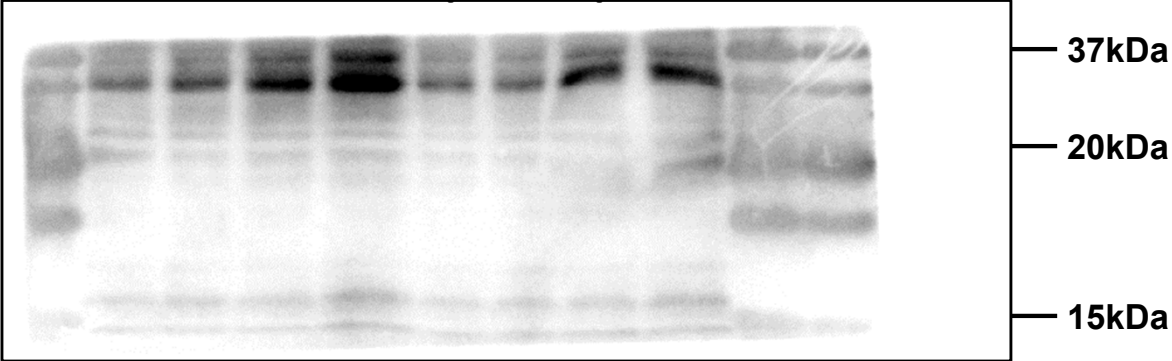

**IL-1 $\beta$**

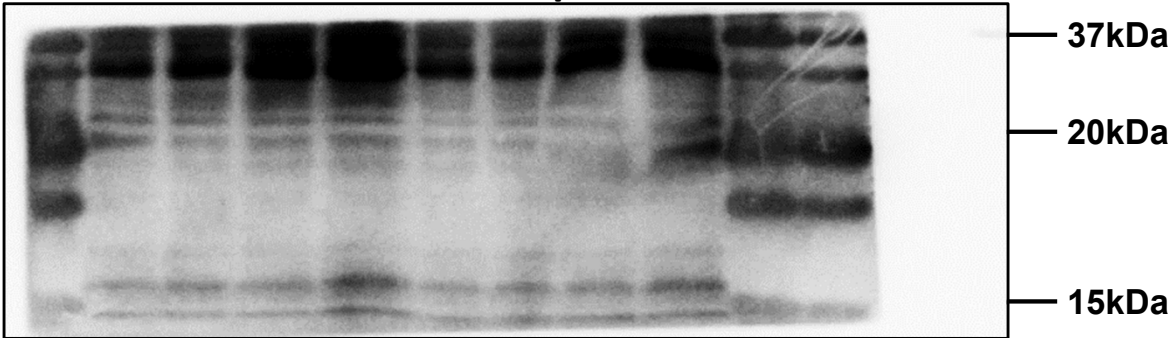

**IL-10**

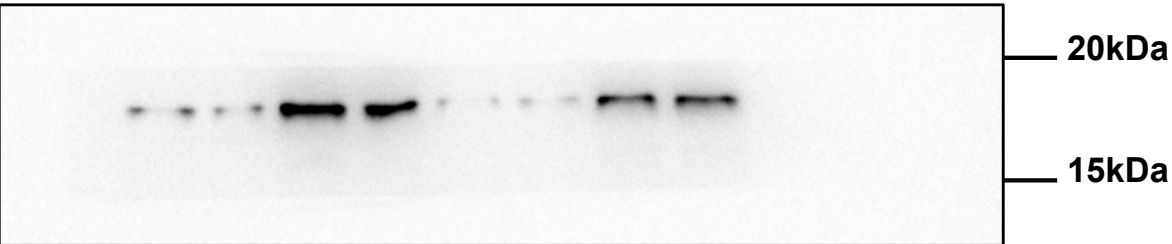

**$\beta$ -actin**

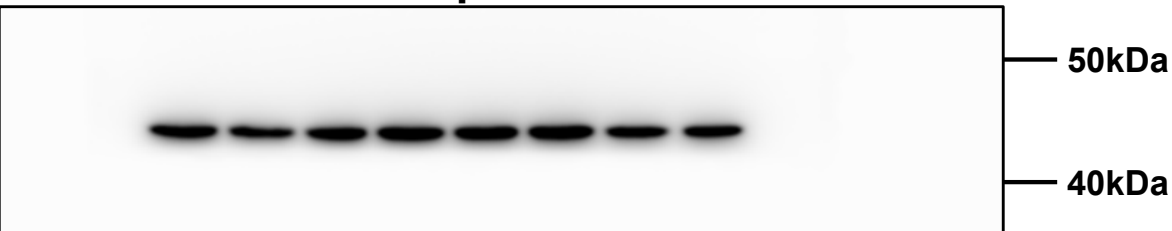

Supplement: 41419_2023_6414_MOESM3_ESM.pdf [file 41419_2023_6414_MOESM3_ESM.pdf]
